# Supplementary material
Source: publisher figshare collection journal article supplement (https://tandf.figshare.com/ndownloader/files/22678571)
Supplement: Supplementary file 1 [file 22678571]

**Supplementary Table S1** Primers used in this study

| Primer | Sequence (5'-3') | Position a  (nt) | Use |
| --- | --- | --- | --- |
| HVX-F1 | CTTCAAACAAAGAAGTTTAATTTCGC | 25-50 | genome amplication |
| HVX-R1 | GGAGGTGATTGGTGAAAGTAACTTTC | 2,774-2,997 | genome amplication |
| HVX-F2 | CATGATCGCCGGCCTTGACC | 2,642-2,661 | genome amplication |
| HVX-R2 | TGAATGCCAATAGCAGCGCG | 5,444-5,46 | genome amplication |
| HVXf | ATCCGTTATCTACAGGGGACCAG | 5,329-5,351 | HVX detection |
| HVXr | TAAGTTAGTGGAACGGTTAGCCCGAT | 6,370-6,395 | HVX detection |
| RA5 | TGGAGTCTTTGGGAGGTAGTGAC | 351-373 | 5’RACE |
| RA3 | ACCACTCAGGGTCCTCAGGGA | 5,874-5,894 | 3’RACE |

a Binding positions relative to the genome sequences of hosta virus X (JQ911698)
